# Supplementary material for: Phosphatidylinositol 4,5-bisphosphate (PIP2) controls magnesium gatekeeper TRPM6 activity
Source: PubMed Central journal article supplement — Sci Rep. 2011 Nov 9;1:146. doi: 10.1038/srep00146 (PMC3238349; doi:10.1038/srep00146), 2011-11-09

## SUPPLEMENTARY MATERIAL

### PHOSPHATIDYLINOSITOL 4,5-BISPHOSPHATE (PIP<sub>2</sub>) CONTROLS MAGNESIUM GATEKEEPER TRPM6 ACTIVITY

**Jia Xie<sup>1</sup>, Baonan Sun<sup>1</sup>, Jianyang Du<sup>1</sup>, Wenzhong Yang<sup>1</sup>, Hsiang-Chin Chen<sup>2</sup>, Jeffrey D. Overton<sup>2</sup>, Loren W. Runnels<sup>2</sup>, Lixia Yue<sup>1\*</sup>**

From Calhoun Cardiology Center, Department of Cell Biology, University of Connecticut Health Center, Farmington, CT<sup>1</sup>, and Department of Pharmacology, UMDNJ-Robert Wood Johnson Medical School, Piscataway, New Jersey<sup>2</sup>, USA.

**Supplemental Figure 1. Effects of CCh on TRPM6 current in the HEK293 cells without M1 receptor.** **A**, Representative traces in the absence and presence of 200 $\mu$ M CCh. **B**, Time course of TRPM6 current development and response to the CCh in the HEK293 without M1 receptor over-expression.

**Supplemental Figure 2. PLC inhibitor directly blocks both TRPM6 and TRPM7 currents.** **A**, Representative traces of TRPM6 in response to PLC inhibitor U73122 (5 $\mu$ M) and its inactive analogue U73343 (100 $\mu$ M). **B**, Normalized TRPM6 current before and after PLC inhibitor U73122 (5 $\mu$ M) and its inactive analogue U73343 (100 $\mu$ M) perfusion. **C**, Representative traces of TRPM7 in response to PLC inhibitor U73122 and its inactive analogue U73343. **D**, Averaged inhibition of TRPM7 by PLC inhibitor U73122 and its analogue U73343.

**Supplemental Figure 3. Effects of downstream pathways of GTP $\gamma$ S on TRPM6.** **A**, Effects of 5  $\mu$ M Forskolin and 1  $\mu$ M PDBu on TRPM6 currents. **B**, Normalized current amplitude of TRPM6 after treatment with Forskolin and PDBu (n=6). Note TRPM6 currents were not influenced by cAMP activator Forskolin or PKC activator PDBu. **C**, Translocation of PH-GFP from plasma membrane to cytosol induced by 0.5  $\mu$ M GTP $\gamma$ S included in the pipette solution. Method for measurement of PH-GFP translocation is detailed in Fig. 3. **D**, Translocation of PH-GFP

from plasma membrane to cytosol induced by application of CCh. Note the translocation of PH-GFP by GTP $\gamma$ S is slower than that induced by CCh because GTP $\gamma$ S needs to be dialyzed into the cells.

**Supplemental Figure 4. Effects of Rap on TRPM6 in cells transfected with phosphatase-dead mutant D281.**

**A**, Representative traces before and after Rap application in cells transfected with TRPM6, lyn-FRB (LDR), and CF-InP-D281A. **B**, Time course of the TRPM6 current before and after 10 $\mu$ M Rap. **C**, Normalized current density comparison before and after Rap.

**Supplemental Figure 5. Inclusion of PIP<sub>2</sub> slows down inactivation of TRPM6 caused by activation of Ci-VSP.**

The protocol used for Ci-VSP activation was as same as shown in Fig. 3A. TRPM6 was almost completely inactivated within 100 s; whereas less than 50% of TRPM6 was inactivated within 200 s and that inactivation seemed to have reached a plateau when pipette solution contained 10  $\mu$ M PIP<sub>2</sub>.

**Supplemental Figure 6. Inactivation of TRPM6 by PIP<sub>2</sub> depletion under perforated-patch configuration. A,**

Representative traces of TRPM6 recorded before and after depolarization. The protocol used for these recordings was similar to that in Fig. 3A except the holding potential after each ramp was +60mV to maintain the Ci-VSP activity in order to out-beat PIP<sub>2</sub> re-synthesis process. **B**, Time course of TRPM6 current inactivation induced by Ci-VSP activation in cells co-transfected with TRPM6 and Ci-VSP. **C**, Mean current amplitude of TRPM6 before and after Ci-VSP activation (n=9, \* p<0.05).

**Supplemental Figure 7. Inactivation of TRPM7 by PIP<sub>2</sub> depletion under perforated-patch configuration. A,**

Representative traces of TRPM7 recorded before and after depolarization, using the protocol detailed in Fig. 3. **B**, Mean current amplitude of TRPM7 before and after Ci-VSP activation (n=9, \* p<0.05).

**Supplemental Figure 8. PIP<sub>2</sub> depletion abolishes potentiation effects of 2-APB on TRPM6. A,**

Time-dependent inactivation of TRPM6 induced by activation of Ci-VSP in a TRPM6 and Ci-VSP co-transfected cell. Experimental protocol for activating Ci-VSP is as same that shown in Fig 3A. Application of 2-APB (200  $\mu$ M) at time point “a” was able to potentiate TRPM6, but 2-APB failed to increase TRPM6 current when applied at time point “c” when TRPM6 was completely inactivated by Ci-VSP activation. **B**, Representative currents of TRPM6 before (“a”) and after application of 2-APB (“b” and “c”). Similar results were obtained in another 5 experiments.

**Supplemental Figure 9. Kinase domain of TRPM6 interacts with PLC isoforms, but the interaction is not necessary for PLC induced inactivation of TRPM6 and TRPM7. A,**

Coomassie blue staining of purified GST tagged kinase domain of TRPM6 and TRPM7 from bacteria. **B**, A GST-pulldown purification assay using purified GST tagged kinase domain with the cell lysates from HEK-293 cells transfected with various isoforms of PLC.

GST tagged TRPM6 kinase domain (GST-M6 KIN) and TRPM7 kinase domain (GST-M7 KIN) were expressed and purified from bacteria. Different isoforms of PLC were transfected to HEK293 cells. Antibodies against different isoforms were used to detect the bound PLC protein. **C**, Representative traces of TRPM6- $\Delta$ kinase recorded in cells dialyzed with or without 1 mM GTP $\gamma$ S in the pipette solution. 2-APB (200 $\mu$ M) was used to verify that the currents recorded were TRPM6 but not TRPM7 currents. **D**, Comparison of the TRPM6- $\Delta$ kinase current density in cells with or without 1mM GTP $\gamma$ S in the pipette solution (n=7, \*p<0.05). **E**, Representative traces of the TRPM7- $\Delta$ kinase recorded in cells dialyzed with or without 1 mM GTP $\gamma$ S in the pipette solution. **F**, Normalized current amplitude of TRPM7- $\Delta$ kinase with or without 1mM GTP $\gamma$ S treatment (n=8,\* p<0.05).

# Supplemental Fig.1

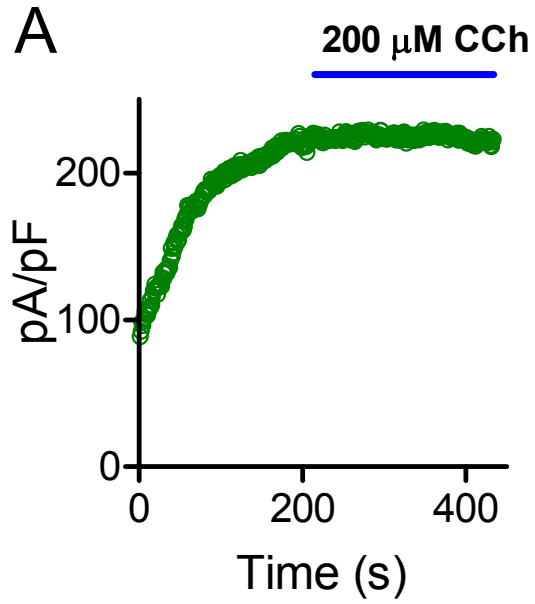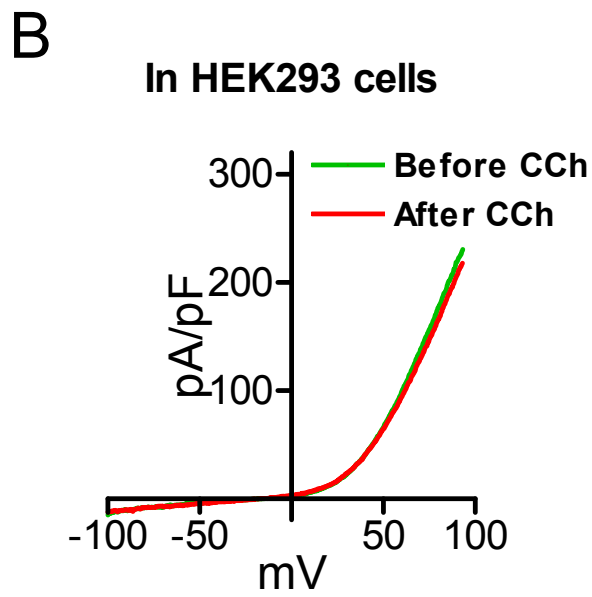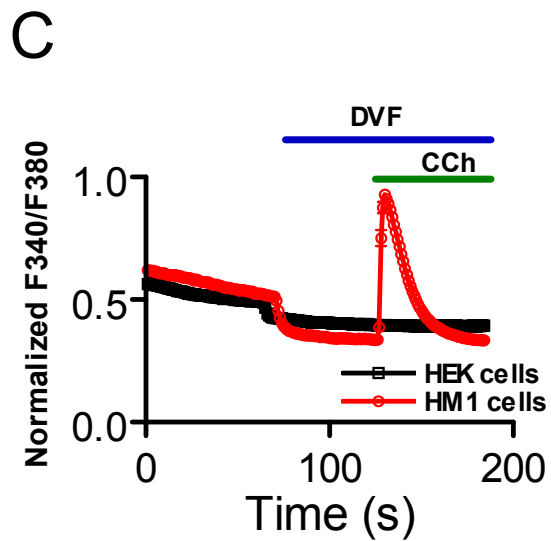

# Supplemental Fig. 2

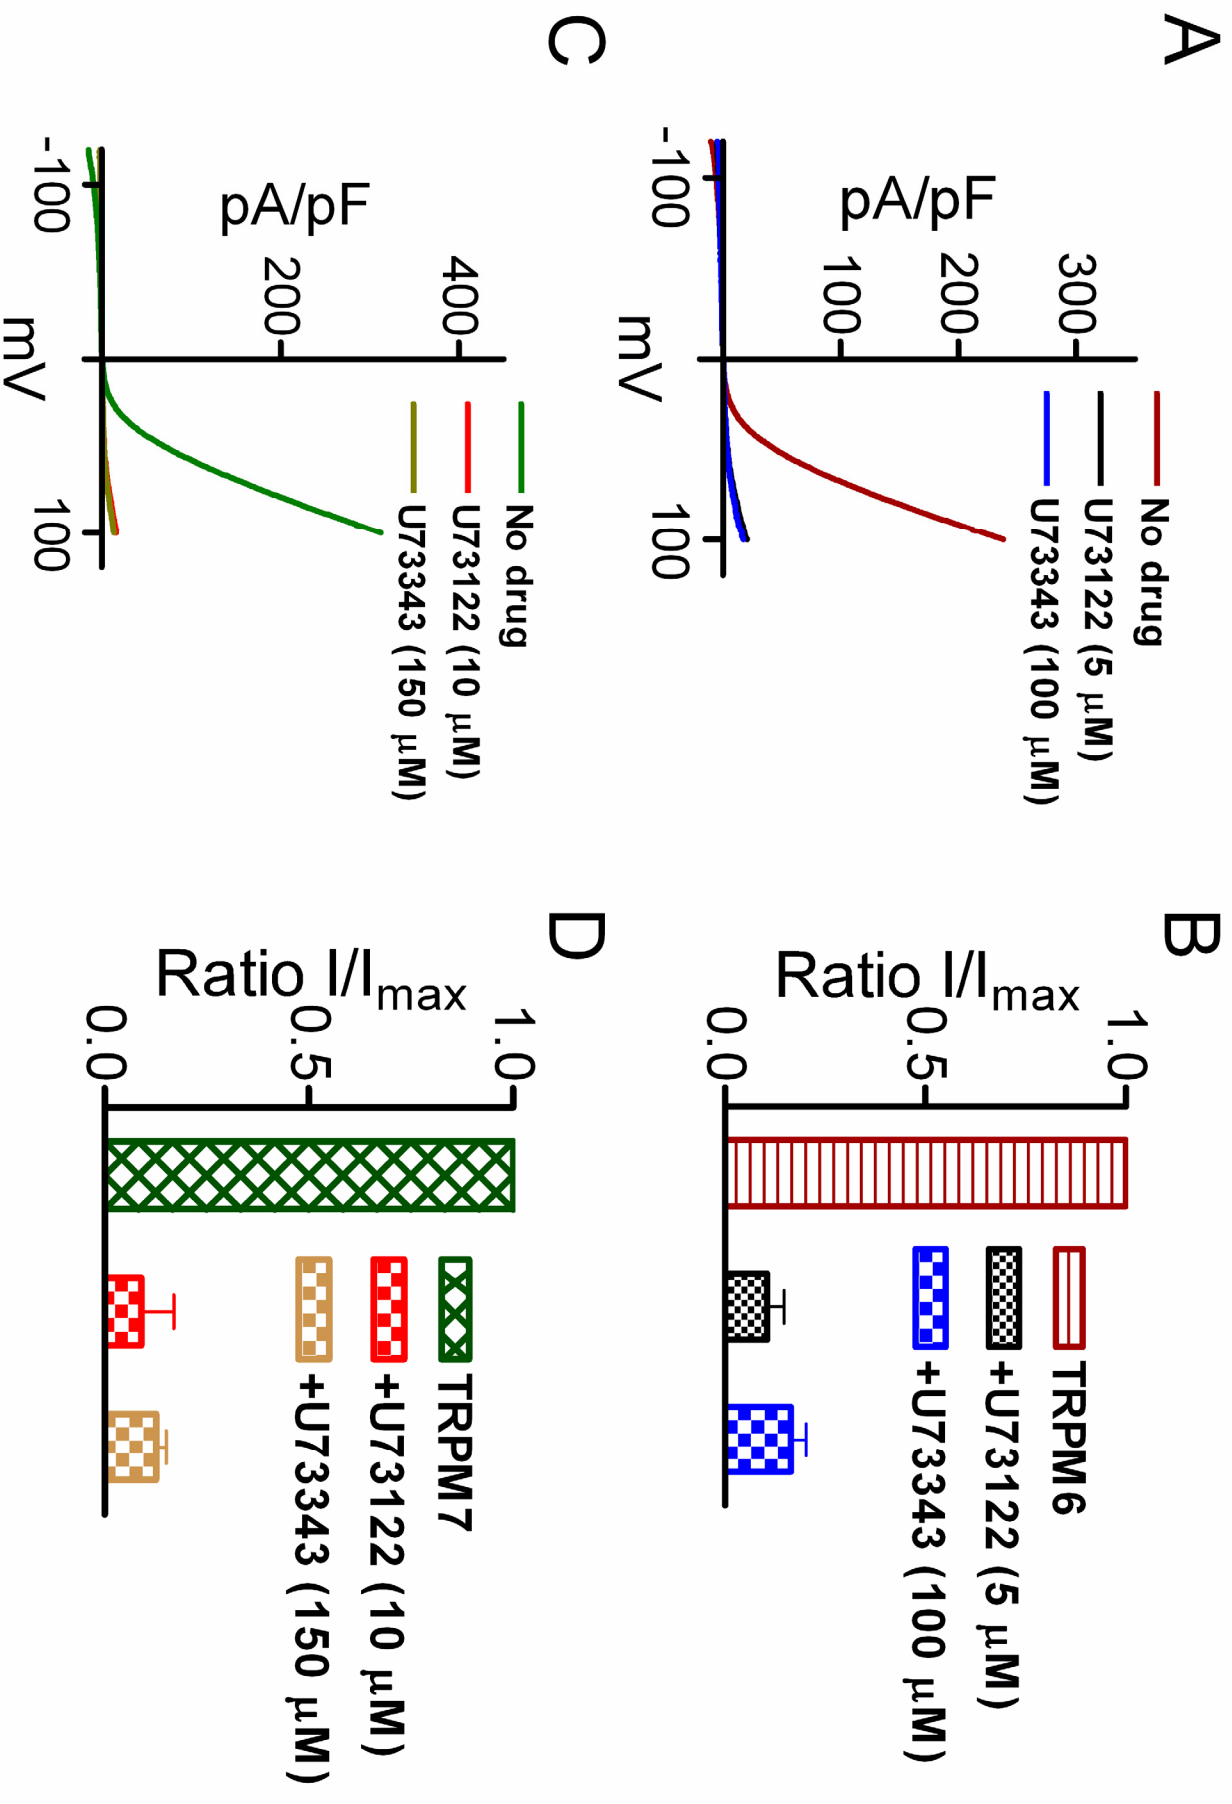

# Supplemental Fig. 3

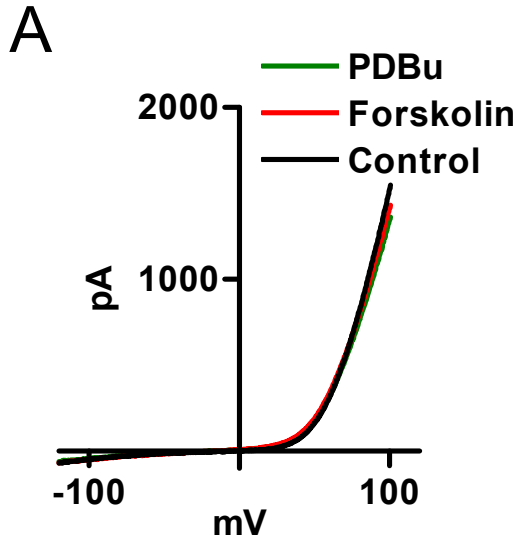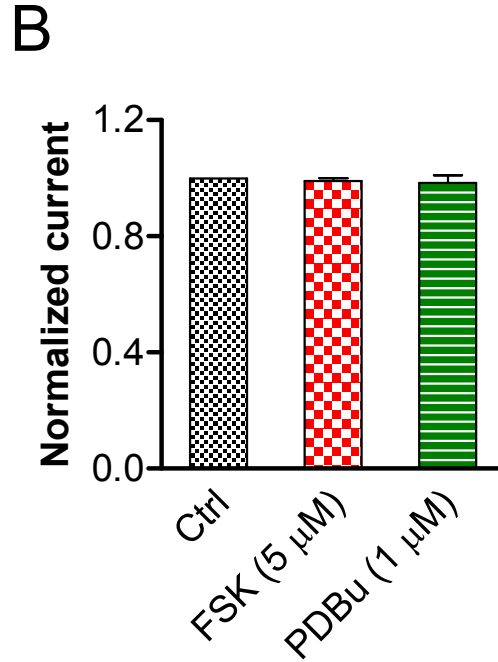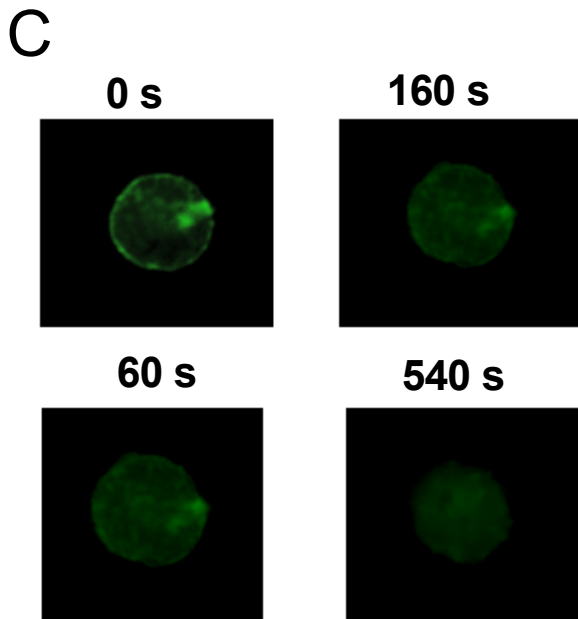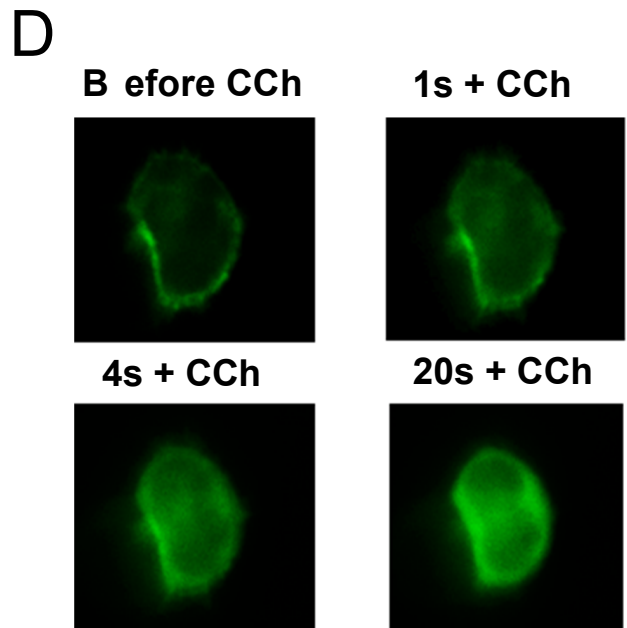

# Supplemental Fig. 4

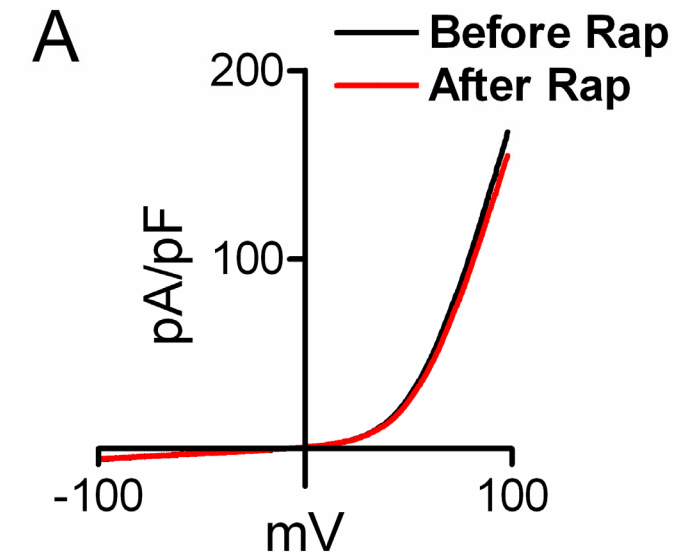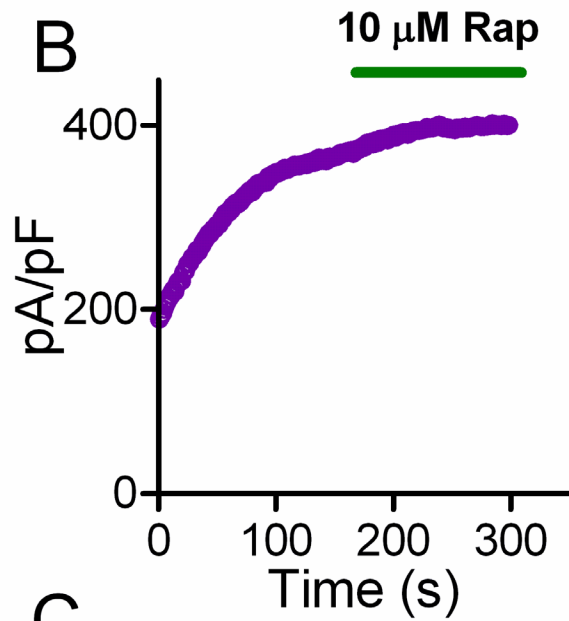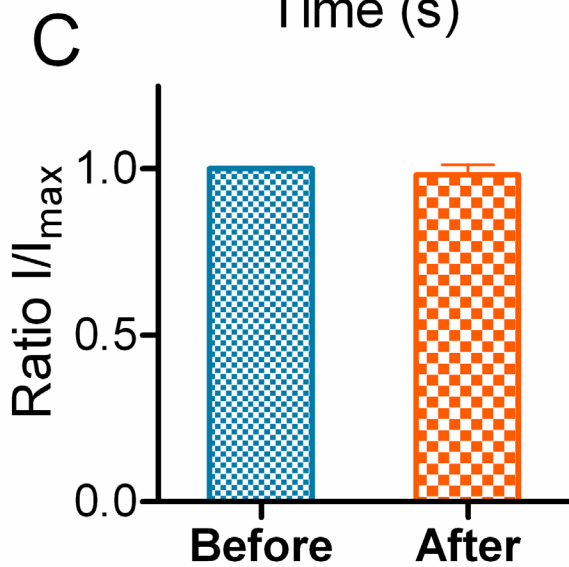

# Supplemental Fig. 5

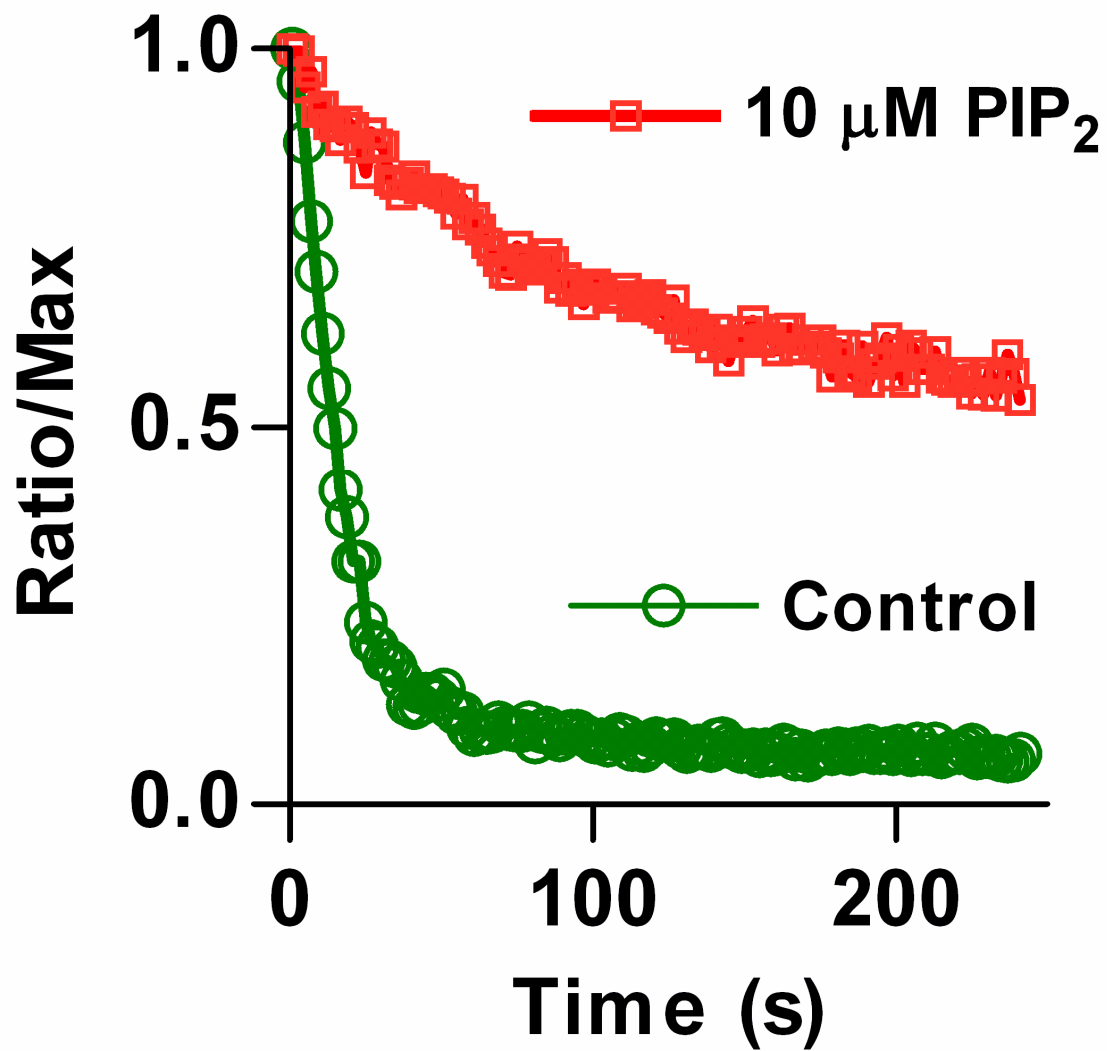



# Supplemental Fig. 6

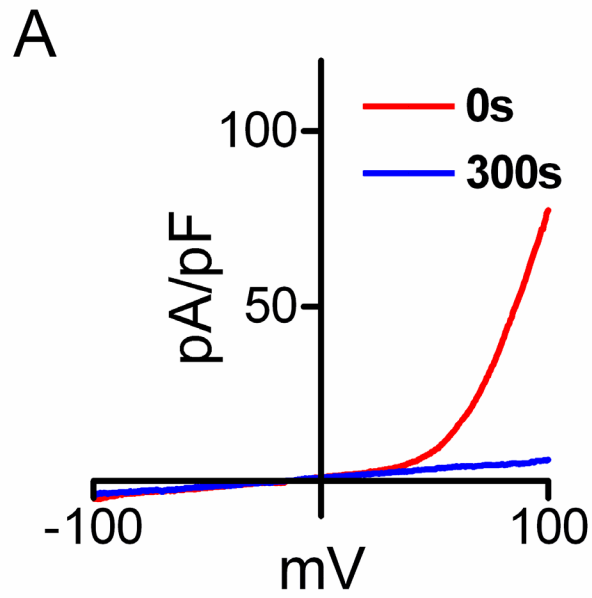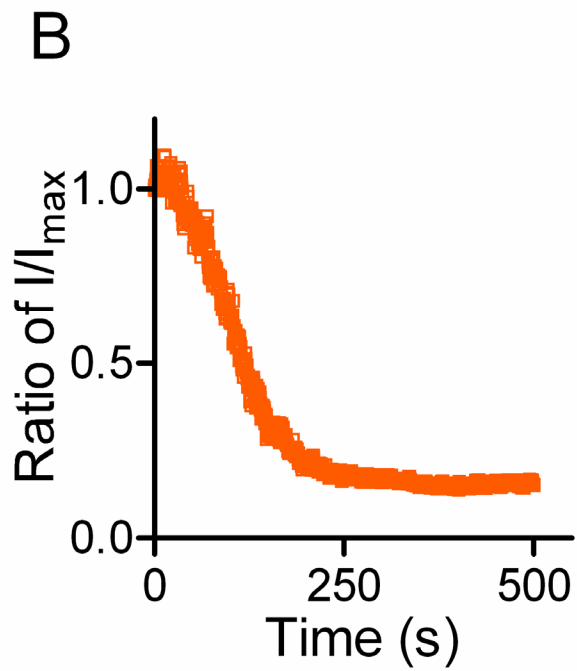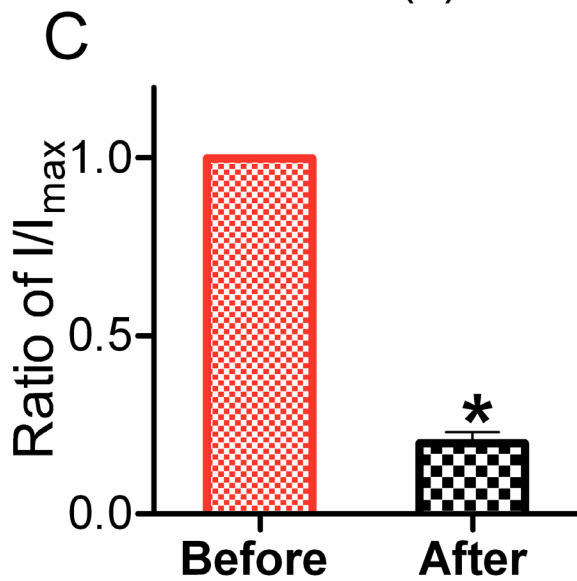

# Supplemental Fig. 7

A

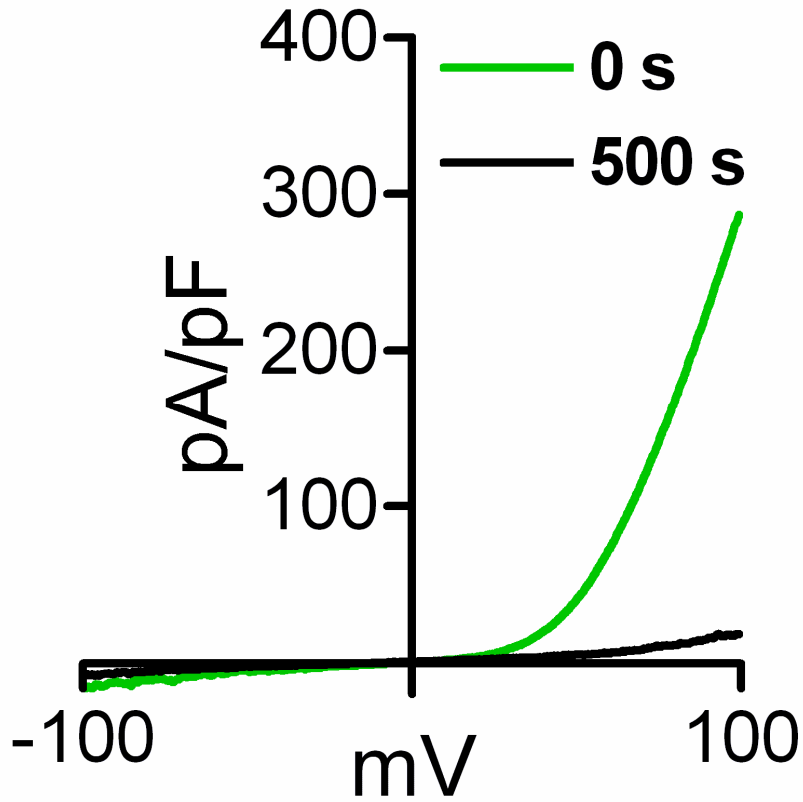

B

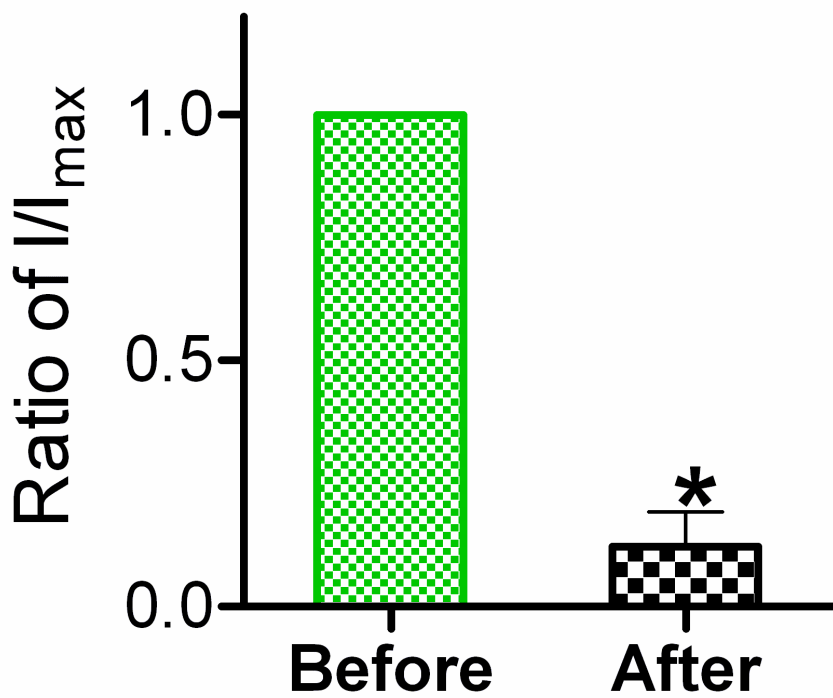

Supplemental Fig. 8

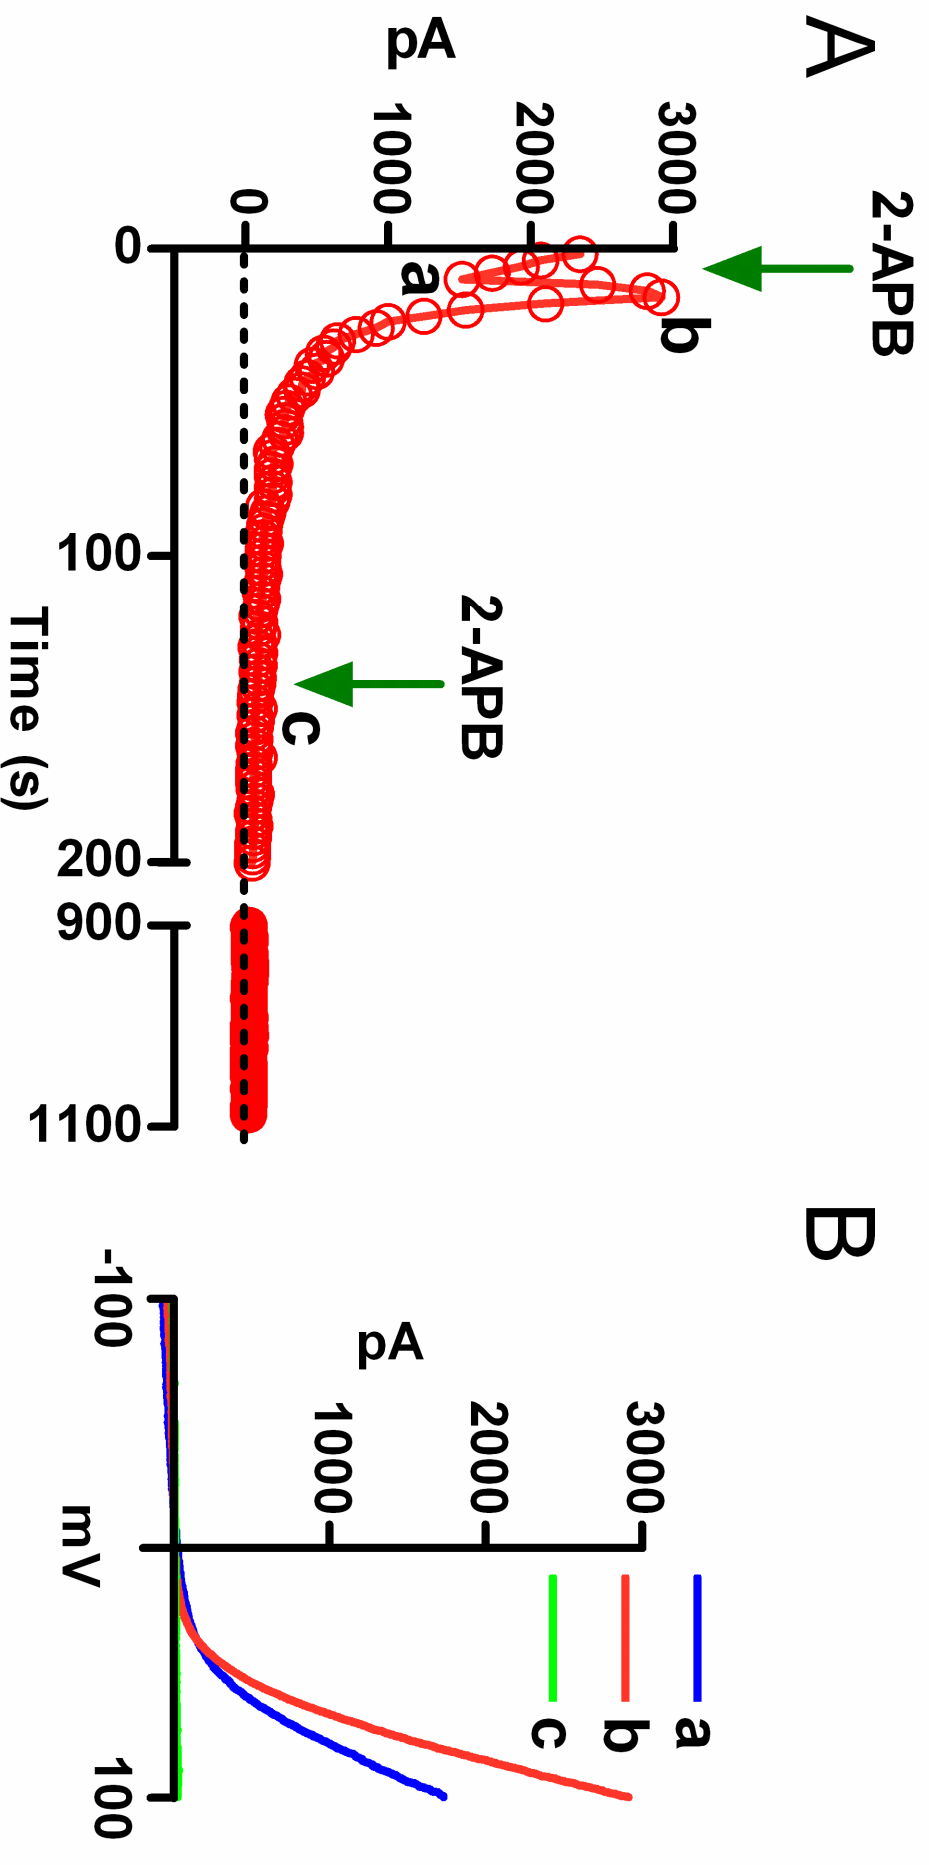

# Supplemental Fig. 9

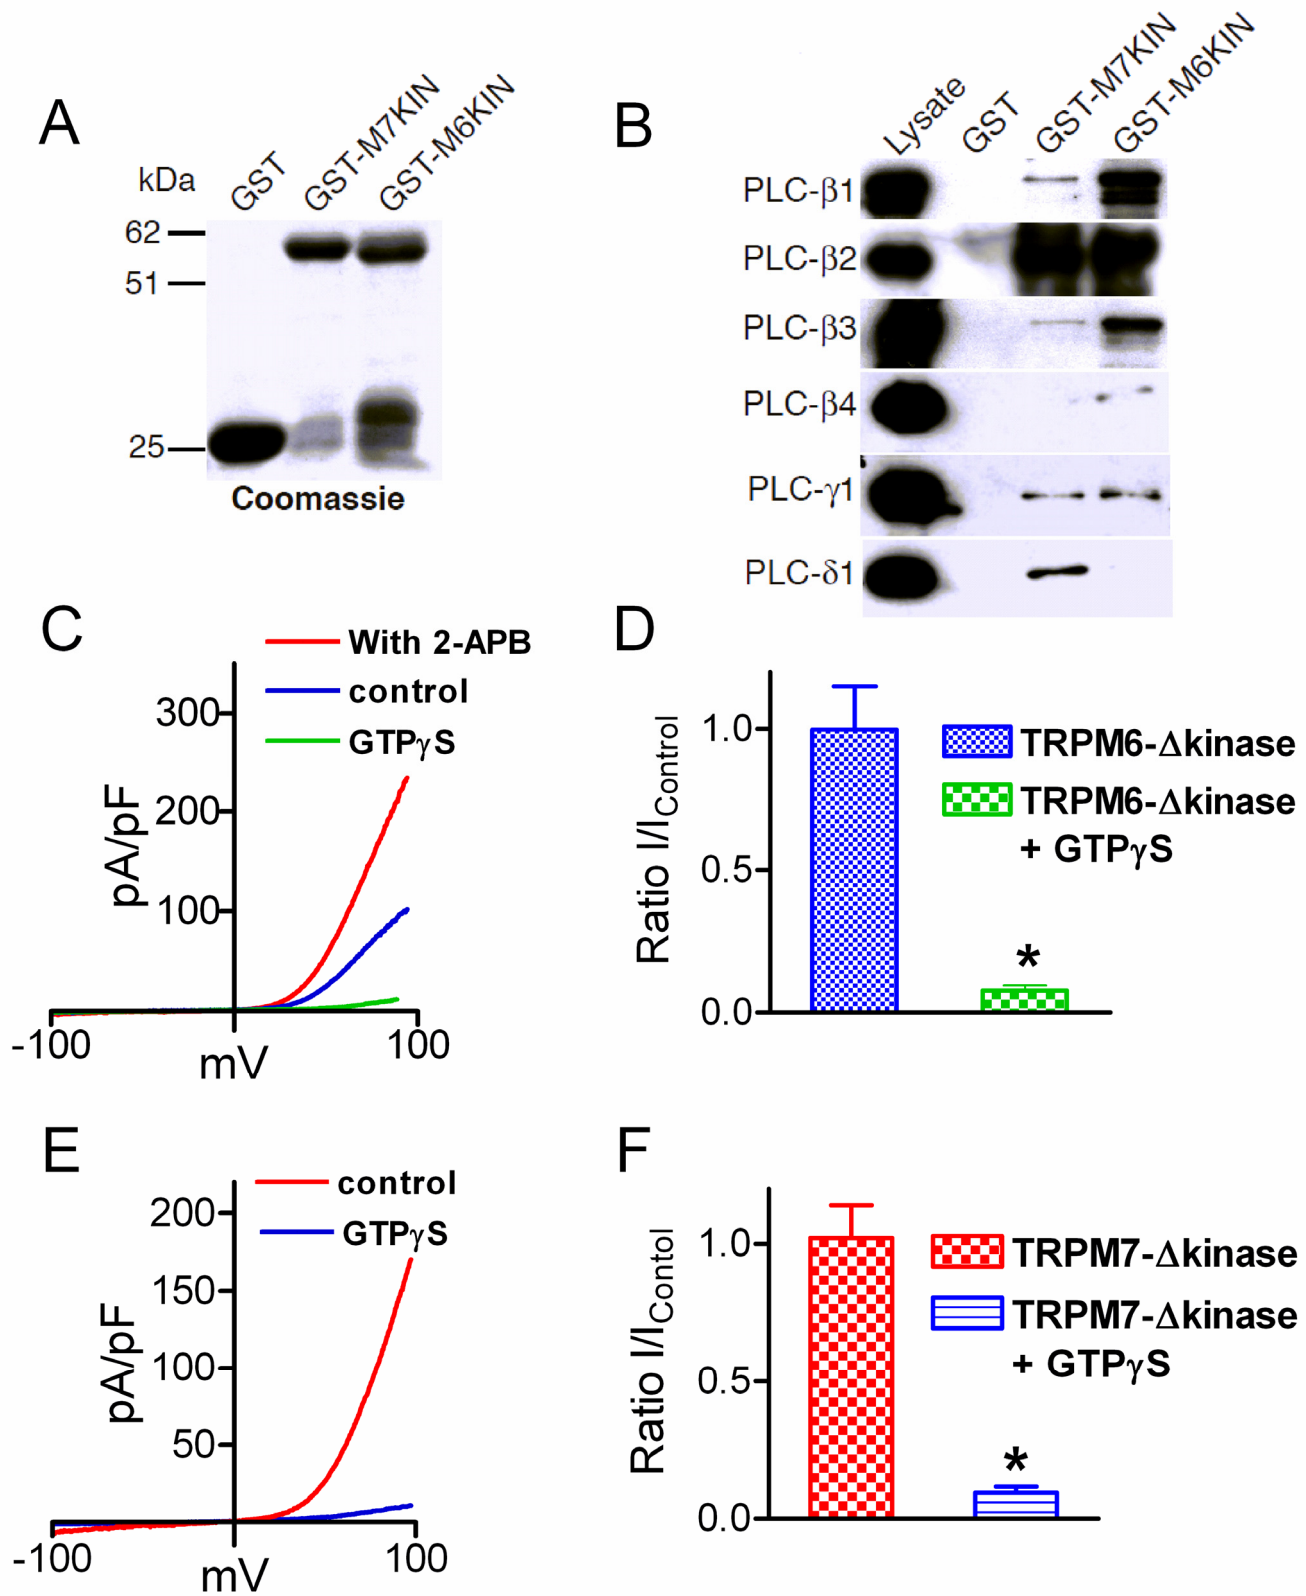

Supplement: srep00146-s1.pdf [file srep00146-s1.pdf]
